# Supplementary material for: Histone H3 trimethylation at lysine 36 is associated with constitutive and facultative heterochromatin
Source: HighWire-hosted journal article supplement (doi:10.1101/gr.118091.110), 2011-07-29
Supplement: Chantalat118091_SupMethods.pdf [file Chantalat118091_SupMethods.pdf]

# Chantalat\_Supplemental Methods

## Supplemental Methods

### Antibodies used in ChIP and Immunofluorescence experiments

| Table S3                            |                                    |          | In the present study |                           |
|-------------------------------------|------------------------------------|----------|----------------------|---------------------------|
| Histone modification                | Reference                          | Batch#   | Applications         | Validated by Western Blot |
| H3K36me3                            | Abcam, ab9050                      | 136352   | ChIP                 |                           |
|                                     |                                    | 453638   | ChIP                 |                           |
|                                     |                                    | 467477   | ChIP                 |                           |
|                                     |                                    | 475787   | ChIP, IF             | yes                       |
|                                     |                                    | 653080   | ChIP, IF             | yes                       |
|                                     |                                    | 712985   | ChIP, IF             | yes                       |
|                                     |                                    | GR3639-1 | ChIP                 |                           |
| H4K20me3                            | Abcam, ab9053                      | 232666   | ChIP                 |                           |
|                                     |                                    | 351833   | ChIP                 |                           |
|                                     |                                    | 361931   | ChIP                 |                           |
| H3K9me3                             | Abcam, ab8898                      | 422483   | ChIP                 |                           |
|                                     |                                    | 472044   | ChIP, IF             |                           |
|                                     |                                    | 733954   | ChIP                 |                           |
| H3K79me3                            | Abcam, ab2621                      | 435039   | ChIP                 |                           |
|                                     |                                    | 456837   | ChIP                 |                           |
| H3K4me2                             | Abcam, ab32356 (monoclonal Ab Y47) | 506639   | CHIP, IF             |                           |
|                                     | Upstate , 07-030 (polyclonal Ab)   | 26335    | ChIP                 |                           |
| H4Ac                                | Upstate, 06-599                    | 29532    | ChIP                 |                           |
| H3Ac                                | Upstate, 06-866                    | 25233    | ChIP                 |                           |
| H3K27me2/3                          | Monoclonal 7B11, from D Reinberg   |          | ChIP                 |                           |
| <b>Others Ab used in this study</b> |                                    |          |                      |                           |
| HP1 $\alpha$                        | Euromedex, 2HP-1H5-As              | 992709   | IF                   |                           |
| RNAPII CTD repeat                   | Abcam, ab5408 monoclonal 4H8       | 646081   | ChIP                 |                           |

**Table S3 :** References and batches of the antibodies used in this study. The preferential enrichment of H3K36me3 onto the repressed, maternally contributed *Snurf-Snrpn* region was observed for all seven batches of abcam 9050 antibodies that we tested in this study. Upstate (Upstate Biotechnology/Millipore, Billerica MA, USA) ; Abcam (Abcam, Cambridge, UK).

### **Chromatin Immunoprecipitation using high stringency washing buffers**

We confirmed the specificity of H3K9me3 and H3K36me3 distribution pattern by performing ChIP experiments with high stringency washes. After binding to Protein G Sepharose, immunoprecipitated chromatin was sequentially washed at RT with low salt buffer (150mM NaCl, 20mM Tris pH 8.0, 2mM EDTA, 1% Triton X-100, 0.1% SDS), high salt buffer (500mM NaCl, 20mM Tris pH 8.0, 2mM EDTA, 1% Triton X-100, 0.1% SDS), lithium chloride buffer (250mM LiCl, 20mM Tris pH 8.0, 1mM EDTA, 1% deoxycholic acid, 1% IGEPAL), and ChIP buffer. Bound chromatin was eluted as described in the “Methods” section of the manuscript. ChIP experiments presented in Supplemental S7 were performed using this alternative protocol.

### **Design of allele-specific primers for ChIP-qPCR**

To measure allele-specific chromatin differences in the *Snurf-Snrpn* 3Mb region, we developed a quantitative real-time PCR assay that allows the discrimination of maternal and paternal alleles within the region spanning position 66527171 to 70251665 on chromosome 7 (NCBI build 37). We initially chose to analyze histone modifications at the level of 67 different loci, which were selected following two criteria: i) probe one locus every 50 kb (in average) in this region, to follow the distribution of histone marks across the 3 Mb region ii) probe genes and other loci of interest (e.g. the Imprinting Center, located upstream of *Snrpn*). Using PCR amplification of 700-900 bp fragments and sequencing, we identified around 400 sequence polymorphisms (either SNPs or small deletion/insertion) within the mouse *Snurf-Snrpn* imprinted region of C57BL/6 and JF1/Ms strains. Sequenced regions and associated polymorphisms were next used to design PCR primers that could distinguish the JF1/Ms and C57BL/6 genomes at each locus, as previously described (Gupta et al. 2005). Except for one primer set, polymorphisms were systematically incorporated into the primer at the 3' terminus. The primer having a mismatch at the 3' end when hybridized to the template is amplified with a reduced efficiency, allowing discrimination between matched and mismatched templates. Each allele-specific primer was used in combination with a second primer that hybridizes equally the C57BL/6 and JF1/Ms genomes. Out of the 67 selected regions, 35 regions could be efficiently amplified with pairs of oligonucleotides specific for each strain. For ten primer sets, we incorporated an additional nucleotide mismatch located two or three bases from the 3' end of the allele-specific primers, to improve mismatch detection (Gupta et al. 2005). Examples of allele-specific PCR amplification are shown in Supplementary Figure S1. Primer sequences are available in Table S1 (columns 3 to 5). Our primer sets can discriminate the two parental alleles of all *Snurf-Snrpn* coding

genes, four positions within the Imprinting Center, and a series of randomly chosen non-coding regions (Fig. 1A).

### Real-time PCR analysis of control regions after H3K36me3 chromatin immunoprecipitation

qPCR experiments were carried out directly onto immunoprecipitated chromatin, in a total volume of 10µl, in 384-well plates. The composition of the quantitative PCR assay included 2.5 µl DNA (immunoprecipitated DNA or corresponding pre-amplified input), 0.5 mM forward and reverse primers, and 1X SYBR Green PCR Master Mix (Applied Biosystems, Foster City CA, USA). Amplifications were performed as follows: 2 mn at 95°C, 40 cycles at 95°C for 15 sec and 60°C for 60 sec in the ABI/Prism 7900HT real-time PCR machine (Applied Biosystems). Primers are listed in table S4.

**Table S4 : Primers for ChIP analysis**

| Gene            |    | Forward primer         | Reverse primer         |
|-----------------|----|------------------------|------------------------|
| <i>Slc20a1</i>  | L1 | TTCTGGCTGGAATTCTTAAGT  | TTGCCTAAGCTCAGAACTAAC  |
|                 | L2 | GAGAGCAGAGAGCGTTTTAGA  | GTTTTATTGCCTAAGCTCA    |
|                 | L3 | CGCTCCACCGAAGTATGACA   | ACCGAACGAATTTGCTACATC  |
|                 | L4 | TCATCCTGCCAGTGTGACGCT  | CCCACGGCTCCTTTAAGAC    |
| <i>Calr</i>     | L1 | GATTCTTTGCCATCCTTGACT  | GCCCTTTGTGCTGAACAC     |
|                 | L2 | GAGGTTTGC GTTTCATCACTA | TCTTCCTGACGGGTGTAA     |
|                 | L3 | GGCCAGACAACACCTATGAG   | AGCATCAGGGTCCTTTATCTT  |
|                 | L4 | TTTTGTGTCTTCCCTATTGTG  | GCTGAAACATACGTCACCC    |
| <i>Hsp90ab1</i> | L1 | CCCAATGGCTAGGTAATTTAT  | GCCCTGGAACTCATGGT      |
|                 | L2 | AGCGCAGAGGGAGGGATA     | CACTAGAAGGTGTCCGCAGTC  |
|                 | L3 | GGATTCTACTCGGCCTATCTA  | GCCACCCGCAGACGACT      |
|                 | L4 | GAGGGCAGGGCTTCTTCCA    | GCCCAGTGCTGCTGTTCTCTGA |
| <i>Rpsa</i>     | L1 | CCTGAGTGCTGGCTAGGATTA  | AACTTGCCACATCGTGAATG   |
|                 | L2 | TAGGCCACCACTACCTGA     | ATTTAACTTGCCACATCGTGA  |
|                 | L3 | GTGTGCCCAGTGTATTCCTGT  | CAGCCCGACTCATGTC       |
|                 | L4 | GACTCGGTGGCAAACAGA     | CAAAGACTTAACTTGGCTATT  |

### Quantitative RT-PCR

The following protocol was used to quantify RNA transcripts without distinguishing parental allelic origin. Random-primed RT-PCR was performed at 52°C using superscript III reverse transcriptase (Invitrogen) with 1 µg of total RNA isolated from cells or tissues. qPCR were carried out in 10 µl using the SYBR Green fluorescent dye. Relative expression was calculated after normalization with *Actb*. All reactions were performed in triplicate. Values are mean ± SD. Primers used in this study are listed in the Table S5.

**Table S5**

|                | <b>Forward primer</b>    | <b>Reverse primer</b>   |
|----------------|--------------------------|-------------------------|
| <i>Ndn</i>     | GGGCACACTGATAGTTTCTGA    | CTGCACTGTGGATTGTTGGGATA |
| <i>Mkrn3</i>   | GATCAGTAAGTCCTGCCCACA    | CCTGCACGCTTTCTGGCTCAT   |
| <i>Magel2</i>  | CTGCCACCTCAAGGGTCTTTC    | AGTGACTTTGGGCTCTCTGA    |
| <i>Peg12</i>   | CTGCAGCGACCCTGGCGATT     | CTGTGGCCACCGGGGTTATTA   |
| <i>Snrpn</i>   | AATCTTCATTGGCACCTTCA     | TGCATTCTTTGGCTTGATCTT   |
| <i>Ube3a</i>   | CTTTCGTGACTTGGGAGACT     | TAGATCATAATCATTGGGTT    |
| <i>Actb</i>    | AGATGACCCAGATCATGTTTGAGA | CACAGCCTGGATGGCTACGT    |
| <i>Hprt</i>    | CGTCGTGATTAGCGATGA       | TCCAAATCCTCGGCATAATGA   |
| <i>Setd2</i>   | CGGCTCATGGTTAGAATTGAAAC  | GGCAGGACTGTGAGTGTGTGTT  |
| <i>Whsc1</i>   | CAGCAGCCCAGTTTTTAGTCT    | CCACTGGGACCCAAGCAATTC   |
| <i>Whsc1l1</i> | GTCCGCCGAGGTTGTGC        | CCCTTTCTGTAACCCGGTCTT   |
| <i>Nsd1</i>    | CCGAAATCATGAGCATGTTA     | CGATATTTAGGCATTCTCGAT   |

### Allele-specific quantitative RT-PCR

The following protocol was used to distinguish the paternal and maternal transcripts within the *Snurf-Snrpn* region. Random-primed RT-PCR was performed at 52°C using superscript III reverse transcriptase (Invitrogen) with 8 µg of total RNA, isolated from E17 fetal brains with RNeasy lipid-rich kit (Qiagen), and treated with DNase I (Promega). Control reactions without enzyme were verified negative. For allele-specific assay, each quantitative real-time PCR was performed in 10 µl, using the SYBR Green fluorescent dye (Applied Biosystems) and the set of 35 allele-specific primer pairs, without prior amplification. All reactions were performed in two separate wells, with a common primer and either the C57BL/6-specific primer or the JF1/Ms-specific primer. qPCR were performed

in triplicate, using three independent RNA preparations of post-natal day 1 brain and liver. Relative expression was calculated after normalization with *Hprt* gene.

#### Verification of *Setd2*, *Nsd1*, *Whsc1* and *Whsc1l1* knock-downs

shRNA vectors that target *Setd2*, *Nsd1*, *Whsc1* and *Whsc1l1* mRNAs were constructed using the pHYPER shRNA vector, as described (Berlivet et al. 2010). Sequences encoding the shRNAs, which were designed using the DSIR software (<http://biodev.extra.cea.fr/DSIR/DSIR.html>), are listed in Table S6.

| Table S6       |            | Sense strand sequence | Anti-Sense sequence    |
|----------------|------------|-----------------------|------------------------|
| <b>Setd2</b>   | <b>sh1</b> | GGTAGTGAATTAAGAACAATT | AATTGTTCTTAATTCACCTACC |
|                | <b>sh2</b> | GGTTGTAACAAATAATCTA   | TAGATTATTTGTTACAACC    |
|                | <b>sh3</b> | AGACATGTTCAACTGTCTA   | TAGACAGTTGAACATGTC     |
|                | <b>sh4</b> | AGGAGTACATCAAGAAGTA   | TACTTCTTGATGTACTCC     |
| <b>Whsc1</b>   | <b>sh1</b> | TGGTCCAAAGTGTCAGGTTAC | GTAACCTGACACTTTGGACCA  |
|                | <b>sh2</b> | CCCAATACTACACCTATCAAA | TTTGATAGGTGTAGTATTGGG  |
| <b>Whsc1l1</b> | <b>sh1</b> | CTCACCCGAGATTAACTAAA  | TTTAGTTTAATCTCGGGTGAG  |
|                | <b>sh2</b> | GTTAGAACTTTAGCCCTACT  | AGTAGGGCTAAAGTTTCTAAC  |
|                | <b>sh3</b> | CACAAAGTCTAAGCATGAAAG | CTTTCATGCTTAGACTTTGTG  |
| <b>Nsd1</b>    | <b>sh1</b> | GAGTAACAAAGACGACCAAGA | TCTTGGTCGTCTTTGTTACTC  |
|                | <b>sh2</b> | CGAACTCCAGTTAAGAGTAAC | GTTACTCTTAACTGGAGTTTCG |
|                | <b>sh3</b> | TGAATTTAGATGCCTCCGAAG | CTTCGGAGGCATCTAAATTCA  |

### Analysis of knock-down efficiencies:

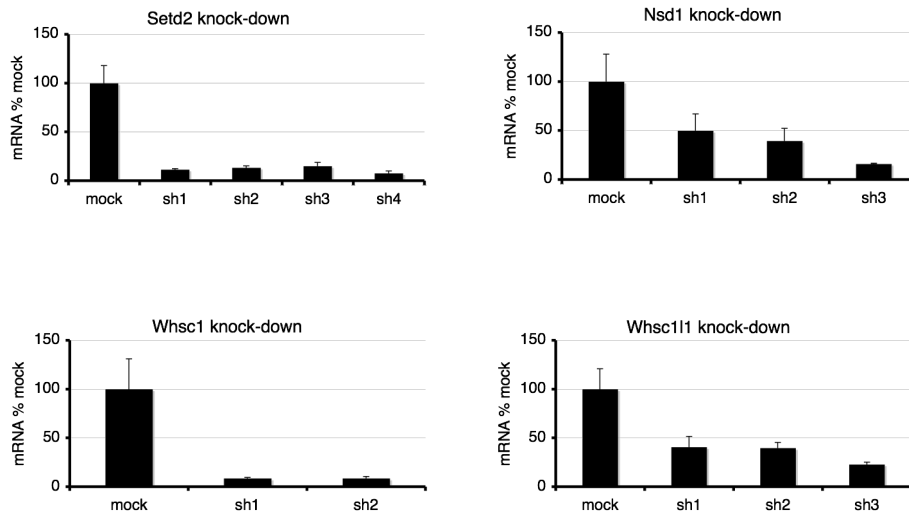

**Efficient depletion of Setd2, Nsd1, Whsc1 and Whsc1l1 mRNAs in ES cells using specific shRNA vectors.** ES cells were electroporated with plasmid vectors expressing shRNAs against *Setd2* (four independent shRNAs), *Nsd1* (three independent shRNAs), *Whsc1* (two independent shRNAs), *Whsc1l1* (three independent shRNAs), or a mock shRNA. Total RNAs were isolated 96h after transfection (including 72h puromycin selection), and relative levels of Setd2, Nsd1, Whsc1 and Whsc1l1 mRNA were quantified by RT-qPCR and normalized to Actb mRNA. Error bars represent the SD from triplicate PCRs.

### Immunofluorescence analysis of Setd2 and Whsc1 knock-down cells

ES and MEF cells were scored for a reduction of H3K36me3 immunofluorescence in the nucleoplasm. Cells transfected with the control pHYPER vector were used as a reference for the 'normal' level of H3K36me3 fluorescence. For each experiment, 400 nuclei were scored as 'normal H3K36me3 fluorescence' or 'low H3K36me3 fluorescence'. The following results are the average of two independent experiments:

Knock-down of *Setd2* in ES cells: 43 % 'normal' and 57 % 'low' (SD=5)

Knock-down of *Whsc1* in ES cells: 97 % 'normal' and 3 % 'low' (SD=2)

Knock-down of *Setd2* in MEF cells: 36 % 'normal' and 64 % 'low' (SD=8)

Knock-down of *Whsc1* in MEF cells: 100 % 'normal' and 0 % 'low' (SD=0)

### **Fetal brain nuclei preparation and nuclease digestion**

E17 brains were dissected in PBS. After tissue homogenization, nuclei were obtained by treatment with 0.15% IGEPAL (Sigma) in the same buffers as for the preparation of chromatin for ChIP experiments. Nuclei were purified on sucrose cushions and resuspended in nuclease buffer: 50 mM Tris-HCl (PH 7.5), 20 mM NaCl, 0.32 M sucrose, 4 mM MgCl<sub>2</sub>, 1 mM CaCl<sub>2</sub>. About  $6 \cdot 10^6$  nuclei were incubated with increasing quantities of DNase I (0.25 to 16 units) and digested during 2 mn. For restriction enzymes, nuclei were further centrifuged at 2000 g and resuspended in restriction enzyme buffers for *KpnI*, *SphI* or *SacI*.  $5 \cdot 10^6$  nuclei were incubated with 60 units of enzyme during one hour at 37°C. For all nucleases, digestions were stopped by adding SDS to 1% and EDTA to 5 mM. DNAs were prepared by proteinase K digestion followed by phenol-chloroform extraction and isopropanol precipitation.

### **Hybridization probes for Southern blot**

*Ndn* exon probe was a 1 kb fragment or a 360 bp fragment derived from this sequence. *LacZ* probe was the full-length 3 kb sequence or a 240 bp fragment derived from this sequence. The mouse major satellite (240bp) probe has been described (Lewis et al. 1992). Probes for *Hoxd-11* were either *Hoxd-11* coding sequences or a DNA fragment including RVIII and RIX regulatory elements (Gerard et al. 1993). These probes gave identical results in nuclease sensitivity assays. Autoradiography exposure was 20 mn for major satellite and 10 days for single copy gene probes.

### **Western blot analysis**

Mouse MEF and ES cell chromatin was prepared as described in (Umlauf et al. 2004). Three gels (12% SDS-PAGE) were migrated with 7 and 14 µg of chromatin, and 0.25, 0.5, 1 and 1.5 µg of recombinant histone H3/H4. One gel was stained with SimplyBlue SafeStain (Invitrogen), to reveal all histones. The two other gels were transferred onto PVDF 0.45 µm membranes (Millipore). Each membrane was incubated overnight with a batch of H3K36me3 antibodies (Abcam 9050, lot 475787 and lot 712985, 1:1000 dilutions). Membranes were washed and revealed with ECL (Amersham). The membranes were stripped and revealed with an antibody against histone H3 (Millipore, clone A3S, Ref 05-928, dilution 1/1000).

For the experiment with yeast chromatin, histones were acid-extracted from yeast as described in (Edmondson et al. 1996). 4µg of proteins were migrated in a 12% SDS-PAGE gel and transferred onto

nitrocellulose. The membrane was incubated overnight with the H3K36me3 antibody (Abcam 9050, lot 653080, 1:500 dilution). Yeast strains were YPH499 (wild type) and clone Boeke-EMH-H3-36|K36A of the non essential histone H3 and H4 mutant collection (OpenBiosystems, YSC5106).

### **Dot Blot analysis**

DNA was prepared from fetal brain chromatin immunoprecipitated with antibodies against the indicated histone modifications, and spotted twice onto a nylon membrane. The membrane was then hybridized with a probe specific for major satellite repeats. Input DNA was used as a positive control.

### **Supplementary references**

- Edmondson, D.G., Smith, M.M., and Roth, S.Y. 1996. Repression domain of the yeast global repressor Tup1 interacts directly with histones H3 and H4. *Genes Dev* **10**: 1247-1259.
- Gerard, M., Duboule, D., and Zakany, J. 1993. Structure and activity of regulatory elements involved in the activation of the Hoxd-11 gene during late gastrulation. *Embo J* **12**: 3539-3550.
- Gupta, M., Yates, C.R., and Meibohm, B. 2005a. SYBR Green-based real-time PCR allelic discrimination assay for beta2-adrenergic receptor polymorphisms. *Anal Biochem* **344**: 292-294.
- Lewis, J.D., Meehan, R.R., Henzel, W.J., Maurer-Fogy, I., Jeppesen, P., Klein, F., and Bird, A. 1992. Purification, sequence, and cellular localization of a novel chromosomal protein that binds to methylated DNA. *Cell* **69**: 905-914.
